# Supplementary material for: Expanding the Anti-Phl p 7 Antibody Toolkit: An Anti-Idiotype Nanobody Inhibitor
Source: MDPI journal article supplement (doi:10.3390/antib12040075), 2023-11-16
Supplement: s1 [file s1]

## Supplementary Materials

### **Expanding the Anti-Phl p 7 Antibody Toolkit: An Anti-Idiotypic Nanobody Inhibitor**

Susan K. Vester <sup>1</sup>, Anna M. Davies <sup>1</sup>, Rebecca L. Beavil <sup>1,2</sup>, Balraj S. Sandhar <sup>1,3</sup>, Andrew J. Beavil <sup>1</sup>, Hannah J. Gould <sup>1</sup>, Brian J. Sutton <sup>1</sup> and James M. McDonnell <sup>1,\*</sup>

<sup>1</sup> Randall Centre for Cell and Molecular Biophysics, King's College London, New Hunt's House, London SE1 1UL, UK

<sup>2</sup> Current address: 272BIO Limited, The Pirbright Institute, B-Block, Ash Road, Pirbright, Woking, Surrey GU24 0NF, UK

<sup>3</sup> Current address: William Harvey Research Institute, Barts and The London School of Medicine and Dentistry, Queen Mary University of London, London EC1M 6BQ, UK

\*Corresponding author (james.mcdonnell@kcl.ac.uk)

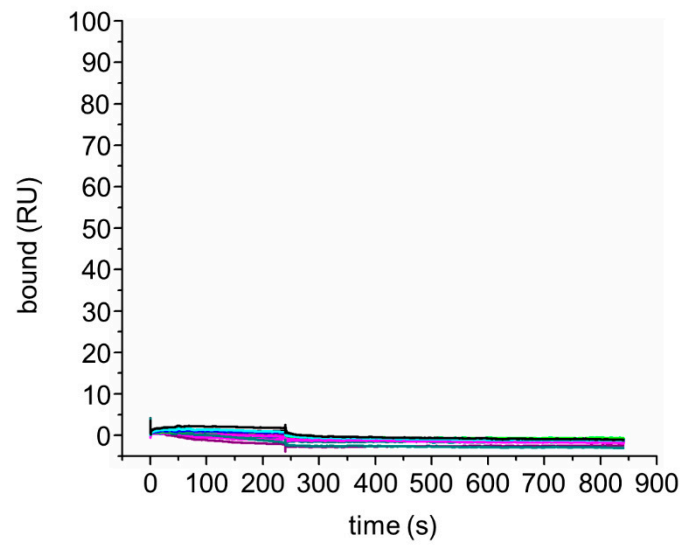

**Supplementary Figure S1:** HAPPID2 Fab binding to a $\delta$ Nb072. a $\delta$ Nb072 was captured on an anti-His-tag chip and HAPPID2 Fab was flowed over in a two-fold dilution series, with the highest concentration 200 nM HAPPID2 Fab (black line) and the lowest concentration 3 nM HAPPID2 Fab (purple line), as in Figure 1. Data are shown in duplicate. RU, resonance units.

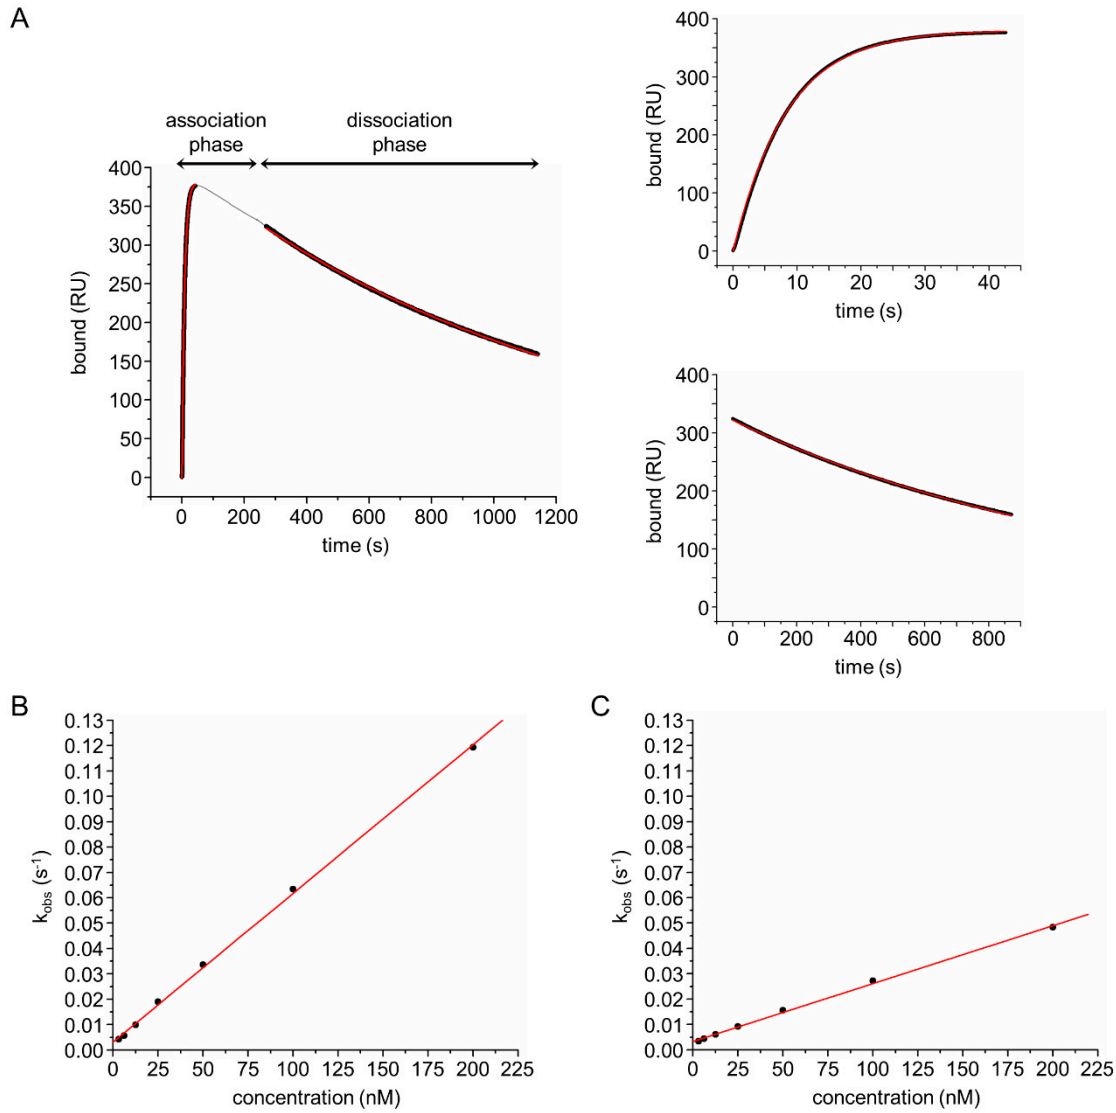

**Supplementary Figure S2: SPR data analysis and fitting.** (A) Example data from Figure 1A showing 200 nM HAPPID1 Fab flowed over a $\delta$ Nb072 captured via an anti-His-tag antibody (gray line). Data ranges that were used for data fitting are shown in black, with the fit of the data shown in red. The right-hand panels illustrate the extracted data used for fitting  $k_{\text{obs}}$  (top panel) and  $k_{\text{off}}$  (bottom panel). (B)  $k_{\text{obs}}$  values (black circles), derived from fitting the association curves of HAPPID1 Fab binding to a $\delta$ Nb072, were plotted against concentration of HAPPID1 Fab to estimate  $k_{\text{on}}$  from the slope of the linear fit (red line). (C)  $k_{\text{obs}}$  values (black circles), derived from fitting the association curves of HAPPIE1 Fab binding to a $\delta$ Nb072, were plotted against concentration of HAPPIE1 Fab to estimate  $k_{\text{on}}$  from the slope of the linear fit (red line).
